# Supplementary material for: Chronic Dehydration in Nursing Home Residents
Source: PubMed Central journal article supplement (PMC7709028; doi:10.3390/nu12113562), 2020-11-20
Supplement: nutrients-12-03562-s001.pdf [file nutrients-12-03562-s001.pdf]

**Table S1.** Correlation coefficient between eGFR and BMI (Pearson's correlation test).

|     | <b>eGFR</b> | <b>p-value</b> |
|-----|-------------|----------------|
| BMI | -0.349      | <0.01          |

eGFR, estimated glomerular filtration rate; BMI, body mass index.
